# 1 Target enrichment improves culture-independent 2 detection of *Neisseria gonorrhoeae* direct from sample 3 with Nanopore sequencing.

## 4 5 1. Author names

6 Teresa L. Street<sup>1,2\*</sup> (ORCID: 0000-0001-8491-240X), Nicholas D. Sanderson<sup>1,2\*</sup> (ORCID: 0000-  
7 0001-6370-1961), Leanne Barker<sup>1</sup>, James Kavanagh<sup>1</sup>, Kevin Cole,<sup>3</sup> The GonFast Investigators  
8 Group, Martin Llewelyn<sup>3</sup>, David W. Eyre<sup>2,4</sup> (ORCID: 0000-0001-5095-6367)  
9

## 10 2. Affiliation(s)

11 <sup>1</sup>Nuffield Department of Medicine, University of Oxford, John Radcliffe Hospital, Oxford, UK;

12 <sup>2</sup>National Institute for Health Research Oxford Biomedical Research Centre, John Radcliffe  
13 Hospital, Oxford, UK;

14 <sup>3</sup>Department of Microbiology and Infection, University Hospitals Sussex NHS Trust, Brighton,  
15 UK;

16 <sup>4</sup>Big Data Institute, Nuffield Department of Population Health, University of Oxford, UK.

17 \*These authors contributed equally to this manuscript. Author order was determined by  
18 mutual agreement.  
19

### 20 2.1 Corresponding author and email address

21 Teresa L. Street  
22 [teresa.street@ndm.ox.ac.uk](mailto:teresa.street@ndm.ox.ac.uk)  
23

### 24 2.2 Keywords

25 *Neisseria gonorrhoeae*, target enrichment, culture-independent, Nanopore sequencing,  
26 SureSelect, AMR.  
27

### 28 2.3 Repositories

29 European Nucleotide Archive study code PRJEB64347.

## 30 3. Abstract

31 Multi-drug resistant *Neisseria gonorrhoeae* infection is a significant public health risk.  
32 Rapidly detecting *N. gonorrhoeae* and antimicrobial resistant (AMR) determinants by  
33 metagenomic sequencing of urine is possible, although high levels of host DNA and  
34 overgrowth of contaminating species hamper sequencing and limit *N. gonorrhoeae* genome  
35 coverage. We performed Nanopore sequencing of nucleic acid amplification test-positive  
36 urine samples and culture-positive urethra swabs with and without probe-based target

37 enrichment, using a custom SureSelect panel to investigate selectively enriching for *N.*  
38 *gonorrhoeae* DNA. Probes were designed to cover the entire *N. gonorrhoeae* genome, with  
39 10-fold enrichment of probes covering selected AMR determinants. Multiplexing was tested  
40 in subset of samples. The proportion of sequence bases classified as *N. gonorrhoeae*  
41 increased in all samples after enrichment, from a median (IQR) of 0.05% (0.01-0.1%) to 76%  
42 (42-82%), giving a corresponding median improvement in fold genome coverage of 365-  
43 times (112-720). Over 20-fold coverage, required for robust AMR determinant detection,  
44 was achieved in 13/15 (87%) samples, compared to 2/15 (13%) without enrichment. The  
45 four samples multiplexed together also achieved >20x genome coverage. Coverage of AMR  
46 determinants was sufficient to predict resistance where present, and genome coverage also  
47 enabled phylogenetic relationships to be reconstructed. Probe-based target enrichment can  
48 improve *N. gonorrhoeae* genome coverage when sequencing DNA extracts directly from  
49 urine or urethral swabs, allowing for robust detection of AMR determinants. Additionally,  
50 multiplexing prior to enrichment provided enough genome coverage for AMR detection and  
51 reduces the costs associated with this method.  
52

#### 53 **4. Impact statement**

54 *Neisseria gonorrhoeae* infection presents a significant public health risk, with multi-drug  
55 resistance present globally. Early detection helps control the spread of antimicrobial  
56 resistant strains. Genome sequencing can be used to detect infections in samples collected  
57 directly from patients, without the need to grow any microorganisms in a laboratory first,  
58 and this has already been demonstrated for gonorrhoea using urine samples. With enough  
59 sequence information it is also possible to detect antimicrobial resistance (AMR), allowing  
60 both detection of infection and information on treatment choices from the same test. This  
61 study assesses a method for enriching *N. gonorrhoeae* sequence data from urine and  
62 urethral swabs, and analyses the impact of enrichment on the detection of genes known to  
63 cause antibiotic resistance. We show that enriching for *N. gonorrhoeae* DNA prior to  
64 sequencing can improve the detection of some AMR genes, and by testing several samples  
65 at the same time we can reduce the costs associated with this method.  
66

#### 67 **5. Data summary**

68 The sequence data generated in this study are deposited in the European Nucleotide Archive  
69 (ENA, <https://www.ebi.ac.uk/ena/browser/>) and are publicly available under study code  
70 PRJEB64347. The authors confirm all supporting data, code and protocols are provided  
71 within the article or through supplementary data files.  
72

#### 73 **6. Introduction**

74 Multi-drug resistant *Neisseria gonorrhoeae* infection presents a significant global public  
75 health risk(1), with resistance to ceftriaxone and/or azithromycin detected in countries  
76 worldwide(2–4). Additionally, cases of *N. gonorrhoeae* infection are increasing. In 2019,  
77 117,881 cases were reported in the EU/EEA, over half of which were reported in the UK with

78 116 cases/100,000 population(5). Early detection and effective treatment is vital to prevent  
79 the spread of drug-resistant strains.

80  
81 Metagenomic sequencing (mNGS) directly from clinical samples offers the potential to  
82 reduce the time to diagnosis and can provide additional information such as detection of  
83 antimicrobial resistance(6), particularly useful in settings where culture is not routine. mNGS  
84 has previously been used to both identify *N. gonorrhoeae*(7) and detect antimicrobial  
85 resistance (AMR) determinants(8) directly from urine samples. A limitation of mNGS is the  
86 high levels of contaminating human DNA present in extracts from clinical samples which  
87 limits the amount of pathogen sequence data generated(6). Target enrichment is a  
88 technique that allows enrichment of genomes or genomic regions of interest prior to  
89 sequencing: Biotinylated RNA oligonucleotide probes, designed to target specific sequences,  
90 allow capture and enrichment of these regions of interest by hybridisation and magnetic  
91 pulldown. Target enrichment has previously been demonstrated to improve the amount of  
92 pathogen sequence generated from mNGS(9–11), improving genome coverage and  
93 detection of AMR determinants(12).

94  
95 This study assesses the ability of probe-based target enrichment to enrich for *N.*  
96 *gonorrhoeae* DNA directly from urine and urethral swab samples for the detection of AMR  
97 determinants using the Oxford Nanopore Technologies (ONT) sequencing platform. We also  
98 tested the efficiency of target enrichment after multiplexing samples together, aiming to  
99 reduce the costs associated with both probe-based enrichment and sequencing.

100

## 101 **7. Methods**

### 102 **7.1 Samples**

103 Samples were selected from those collected as part of a wider study, conducted with NHS  
104 Research Ethics approval (reference 19/EM/0029). Participants were recruited at sexual  
105 health clinics at Oxford University Hospitals NHS Trust, UK, and University Hospitals Sussex  
106 NHS Trust, Brighton, UK. Male patients presenting with symptomatic urethritis were eligible  
107 to participate and were recruited following informed consent. In Brighton, urine samples  
108 were collected into universal tubes containing boric acid (Medline Scientific) for stabilization  
109 during transportation to Oxford. In Oxford, samples were collected into universal tubes  
110 without boric acid. Urethral swabs were placed into Sigma VCM preservation medium  
111 (MWE). All samples were tested for *N. gonorrhoeae* using the BD Viper system (Becton  
112 Dickinson), with confirmatory testing for *N. gonorrhoeae* undertaken using the BD Max  
113 platform (Oxford) or with the FTD gonorrhea confirmation NAAT assay (Fast Track  
114 Diagnostics) (Brighton). Antimicrobial susceptibility testing of cultured bacteria from urethral  
115 swabs was performed manually according to EUCAST methods by disc diffusion (for nalidixic  
116 acid, penicillin, azithromycin, cefuroxime and ciprofloxacin) and E-tests (for cefixime and  
117 cefotaxime) in Brighton, and by E-tests (for ciprofloxacin, azithromycin and ceftriaxone) in  
118 Oxford.

119

## 120 **7.2 Custom probe capture library design**

121 A SureSelectXT custom probe library was designed with Agilent, the manufacturer, to cover  
122 17 closed genomes of *N. gonorrhoeae* identified by the authors to represent the diversity  
123 present across the *N. gonorrhoeae* species (Table S1). Additionally, probes designed to cover  
124 genes known to confer antimicrobial resistance in *N. gonorrhoeae* were represented 10-fold  
125 in the final library (Table S2). The final probe library consisted of consisting of approximately  
126 50,000 120mer RNA probes.

127

## 128 **7.3 DNA extraction, library preparation and sequencing**

129 DNA was extracted from nucleic acid amplification test (NAAT)-positive urine samples and  
130 urethral swabs using the QIAamp UCP pathogen mini kit (Qiagen), as previously  
131 described(7). Samples without enrichment were prepared for sequencing on version 9.4.1  
132 flow cells following library preparation with the rapid PCR barcoding kit (SQK-RPB004, ONT)  
133 also as previously described(7). One sample was run per flow cell on a GridION sequencer.  
134 For SureSelect enrichment, samples were prepared following the Sequence Capture protocol  
135 (ONT), using the ligation kit (SQK-LSK110, ONT) for sequencing with a single sample per flow  
136 cell.

137

## 138 **7.4 Preparation for multiplexed sequencing**

139 To test the feasibility of multiplexing, 4 samples were barcoded with a modified protocol  
140 using the rapid PCR barcoding kit (SQK-RPB004, ONT). Briefly, 200ul DNA extract was  
141 fragmented by tagmentation in a 10 µl reaction with 2.5 µl FRM, then barcoded by PCR in a  
142 double volume reaction for 17 cycles with a 5-minute elongation time at 65°C. Post-PCR,  
143 barcoded DNA was processed following a modified Sequence Capture protocol, as follows.  
144 DNA was end-repaired and PCR adapters ligated as per the original protocol. The initial PCR  
145 was omitted, and instead equimolar amounts of each barcoded, amplified sample were  
146 pooled together prior to hybridisation with the custom probes. Post-hybridisation, the  
147 Sequence Capture protocol was followed as described by ONT and enriched DNA was  
148 prepared for sequencing using the ligation kit, as above.

149

## 150 **7.5 Illumina sequencing of cultured isolates**

151 Cultures from those samples with a viable stock were prepared for sequencing on an  
152 Illumina MiniSeq sequencer. *N. gonorrhoeae* DNA was extracted from cultured cells grown  
153 overnight on chocolate agar at 37°C with 5% CO<sub>2</sub> using the QuickGene DNA tissue kit  
154 (Kurabo) on the QuickGene-Mini80 system (MP Biomedicals), and prepared for sequencing  
155 with the Nextera XT DNA library prep kit (Illumina).

156

## 157 **7.6 Bioinformatic analysis**

158 Nanopore sequences were base called and demultiplexed, where necessary, using Guppy  
159 (ONT, Version 5.0 or higher) automatically on the GridION sequencer. Sequencing reads  
160 classified as human were removed at source with the CRuMPIT workflow, as previously  
161 described(13). Sequences were mapped to the NC\_011035.1 *N. gonorrhoeae* reference  
162 genome using minimap2 (v2.24-r1122) and variant called with clair2 (v2.1.1). Variants were

163 filtered with a random forest classifier, and antimicrobial resistance genes were  
164 characterised from consensus genome sequences or assembled plasmid sequences, both as  
165 previously described(8). The Nextflow workflow is available at  
166 <https://gitlab.com/ModernisingMedicalMicrobiology/genericbugontworkflow>.

167  
168 Illumina sequences from cultured isolates were mapped to the NC\_011035.1 reference  
169 genome with SNIPPY(14) v4.6.0 to generate SNP-only consensus sequences. Positions with  
170 depth lower than 10x coverage were masked as Ns. Hence, both Nanopore and Illumina data  
171 were mapped to the same reference genome and consensus sequences generated from ONT  
172 or Illumina-specific variant calling pipelines. Both Illumina and ONT consensus genomes  
173 were masked for repeat regions using a self-self blast, with a minimum window of 200bp and  
174 90% identity score.

175  
176 A phylogenetic tree was constructed using IQ-TREE v2.1.4-beta(15) and adjusted for  
177 recombination events using clonalframeML v1.12(16) using the runlistcompare wrapper  
178 script v0.3.8 (<https://github.com/davideyre/runListCompare>) for samples with sufficient  
179 genome coverage.

180

## 181 **8. Results**

### 182 **8.1 Samples summary**

183 Twelve urine samples and four urethral swabs were selected for use in this study. Eleven  
184 (11/12, 92%) urines were NAAT-positive for *N. gonorrhoeae* and one (1/12, 8%; sample  
185 382UB) was NAAT-negative with a corresponding culture-positive urethral swab. All four  
186 (100%) urethral swabs were culture-positive for *N. gonorrhoeae*, with corresponding urines  
187 also NAAT-positive. A sample summary is provided in Figure 1 and Figure S1.

188

189 A total of 9/11 (82%) NAAT-positive urines had an additional corresponding culture-positive  
190 urethral swab, with 2/11 (18%) being culture-negative. Antimicrobial susceptibility testing  
191 results on cultured isolates were used for comparisons with mNGS-based predictions.  
192 Results were available for 14 urethral swabs (13 tested in Brighton and 1 in Oxford; 9 with  
193 NAAT-positive urines that were sequenced, 1 with a NAAT-negative urine that was  
194 sequenced, and 4 where the urethral swab was sequenced). All were sensitive to both  
195 cephalosporins and azithromycin (Table 1). For quinolone susceptibility, the single sample  
196 from Oxford (80U) was sensitive to ciprofloxacin, and of the Brighton samples 3/13 (23%)  
197 were sensitive and 10/13 (77%) resistant to nalidixic acid (Table 1). Brighton additionally  
198 tested for susceptibility to penicillin (sensitive in 2/13 (15%)) and for the presence of beta-  
199 lactamase (detected in 9/13, 69%).

### 200 **8.2 Effect of enrichment on *Neisseria gonorrhoeae* genome coverage**

201 Probe enrichment increased the proportion of *N. gonorrhoeae* sequencing reads compared  
202 to no enrichment and did not affect the total sequencing output of the runs (Figure 2). A  
203 comparison of total bases, bases classified as *N. gonorrhoeae* plus genome coverage breadth  
204 and depth before and after enrichment is provided in Table 2. The total number of bases per  
205 sample was similar between enriched (median 10.9Gb, IQR 8.1-17.3) and without  
206 enrichment (median 9.4Gb, IQR 8.4-10.8). Multiplexing samples onto a single flow cell



207 reduced the number of bases per sample, as expected (median 478Mb, IQR 321-918) (Figure  
208 2a). The median proportion of bases classified as *N. gonorrhoeae* increased from less than  
209 0.5% of total sample bases without enrichment (median 0.05%, IQR 0.01-0.1) to more than  
210 75% with enrichment (median 76%, IQR 42-82). Probe enrichment with multiplexing  
211 generated a lower median proportion of *N. gonorrhoeae* bases (33%, IQR 26-45) (Figure 2b).  
212 Average coverage depth of aligned reads increased from a median 5-fold (IQR 4.4-6.7)  
213 without enrichment to 2405-fold after enrichment (IQR 492-5423) and 63-fold (IQR 36-153)  
214 after multiplexed enrichment (Figure 2c). This resulted in all but two samples enriched with  
215 SureSelect probes achieving >96.5% of their genome sequenced at a depth of 300-fold or  
216 more (Table 2). Comparison of genome coverage with and without enrichment demonstrates  
217 no evidence that any bias was introduced by the Sequence Capture protocol (Figure 3).

218  
219 Enrichment failed for two samples (265UB, 321UB). Genome coverage breadth and depth  
220 were similar before and after enrichment: 59% breadth and 3.8-fold depth before and 73%  
221 breadth and 5-fold depth after for sample 265UB, and 58% breadth and 4.4-fold depth  
222 before and 53% breadth and 4-fold depth after for sample 321UB. Due to the high cost of  
223 reagents and the need to order these in batches, we were unable to repeat these  
224 experiments. A detailed summary of all sequence data generated is provided in Table S3.

225

### 226 **8.3 Detection of antimicrobial resistance determinants**

227 Our previous study determined that a minimum 20-fold genome coverage depth is required  
228 for robust AMR prediction(8). In this study 13/15 (87%) of samples achieved this after  
229 enrichment, with a minimum coverage depth of 314-fold (Table S4). Sequence data was  
230 interrogated for variants within genes known to confer resistance to macrolides, quinolones,  
231 cephalosporins, and for the presence of plasmid-mediated genes conferring resistance to  
232 penicillin and tetracycline (Table S4). None of the samples in this study were phenotypically  
233 resistant to cephalosporins or azithromycin, and no genetic determinants known to confer  
234 resistance to these were detected, despite >140-fold coverage of *mtrR* and >90-fold  
235 coverage of *penA*, *ponA* and *porB* in those samples with successful enrichment (Figure 4). Ten  
236 (10/16, 63%) samples were reported as resistant to nalidixic acid. Mutations in *gyrA* (S91F,  
237 D95G) were detected in two samples before enrichment. After enrichment, *gyrA* was  
238 sequenced to a depth of at least 115-fold and mutations were detected in 9/9 (100%) of  
239 those samples with singleplex enrichment: singleplex enrichment sequence data was not  
240 available for one sample (347UB). Additionally, *gyrA* mutations S91F and D95G were found  
241 in sample 361UB after enrichment, which did not grow in culture and therefore had no  
242 susceptibility data reported by the microbiology laboratory.

243

244 For plasmid-mediated resistance, no sequence data containing *ermB*, *ermC*, *ermF* or *mef* was  
245 detected, corresponding with laboratory results of susceptibility to azithromycin. Beta-  
246 lactamase was detected in 9/16 (56%) samples by the laboratory, and sequencing without  
247 enrichment detected the presence of *blaTEM-1* in 6 of these samples, and additionally in  
248 sample 361UB which did not have susceptibility data reported After enrichment, *blaTEM-1*  
249 was only detected in 2 samples using the criteria defined previously(8) , and in 3 samples  
250 when considering coverage breadths lower than the predefined cutoff threshold. Both  
251 samples detected above the threshold were positive by laboratory testing, and one of which  
252 was an additional detection over no enrichment. Although the samples were not tested for

253 susceptibility to tetracycline, *tetM* was detected in 3 samples before enrichment and five  
254 samples after enrichment (4 above and one below the cutoff threshold).

255  
256 Despite 10-fold representation in final probe library, the AMR genes assessed in this study  
257 did not demonstrate a higher coverage depth than the rest of the genome (Figure S2). We  
258 also observed uneven enrichment across the target AMR genes, with poor improvements in  
259 coverage of the 23S gene after enrichment (median (IQR) coverage depth before enrichment  
260 of 1.6 (1.0-3.4) and after enrichment of 6.7 (3.6-12.5)).

261

#### 262 **8.4 Evaluation of multiplexing prior to enrichment**

263 Four samples (80U, 303D, 347UB, 367UB) were multiplexed before hybridisation with the  
264 SureSelect probes. The multiplexed run generated 8.2 gigabases (Gb) of sequence data.  
265 Once bases from misclassified barcodes and unclassified bases were removed, 1.7Gb were  
266 classified as bacterial and, despite enrichment, 1.4Gb classified as human. The median  
267 number of bacterial bases classified as *N. gonorrhoeae* was 111 megabases (Mb) (IQR 55-  
268 305), with a median *N. gonorrhoeae* single-fold genome coverage of 77% (IQR 67-85) (Table  
269 3). In comparison to no enrichment, multiplexed enrichment achieved a median 12-fold (IQR  
270 4.8-33) improvement in genome coverage depth, which is less than the median 365-fold  
271 (IQR 112-720) improvement seen after singleplex enrichment (Table 2). Despite hybridisation  
272 of equimolar amounts of barcoded DNA with the SureSelect probes there was uneven  
273 coverage across the 4 samples, with >700Mb separating the highest and lowest number of  
274 bases classified as *N. gonorrhoeae*.

275

276 All 4 samples achieved genome coverage depth of greater than 20-fold (Table 3), which is the  
277 minimum depth required for robust detection of AMR determinants(8). Three of the four  
278 were resistant to a quinolone (nalidixic acid; 303D, 347UB, 367UB) and one was sensitive  
279 (ciprofloxacin, 80U). Depth was insufficient to resolve the sequence of the *gyrA* or *parC*  
280 genes in any sample without enrichment, and after multiplexed enrichment adequate depth  
281 was achieved to detect mutations in *gyrA* (S91F) in 2/3 resistant samples (303D and 367UB).  
282 Sequencing depth was inadequate to determine resistance in sample 347U, with only 7-fold  
283 coverage depth of *gyrA*. *blaTEM-1* was detected in samples 303D and 367UB without  
284 enrichment, corresponding with the presence of beta-lactamase detected by the laboratory,  
285 but was not detected in sample 347UB despite detection by the lab. After multiplexed  
286 enrichment, *blaTEM-1* was detected below the cutoff threshold in 1/3 samples reported  
287 positive by the laboratory, and in an additional sample without laboratory results (80U).

288

#### 289 **8.5 Assessment of relatedness and comparison of Nanopore with Illumina sequence** 290 **data**

291 Comparison of Nanopore (from urine and swab sequencing) and Illumina genomes (from  
292 isolate sequencing) in a phylogenetic tree showed concordance between the sequencing  
293 methods, demonstrating the ability to infer relatedness: 13/15 (87%) samples had  
294 singleplexed enrichment Nanopore data and 11/15 had Illumina data for analysis, giving a  
295 total of 11 samples with paired Nanopore and Illumina data (Figure 5). The median (IQR)  
296 [range] number of SNPs detected between Nanopore and Illumina sequence pairs generated  
297 from matched urine/swab samples and cultured isolates from the same patient was 44 (38-

298 52) [24-245]. This likely represents a combination of sequencing artefact and true  
299 differences between the samples.

300  
301 Samples genetically further away from the reference genome used showed greater  
302 differences between Illumina and Nanopore results, with samples 303D, 342UB and 358UB  
303 forming sequencing technology-specific clades instead of grouping by patient, as seen in all  
304 the other samples.

305  
306 Two samples without enrichment (202D, 301D) generated enough genome coverage for  
307 inclusion in this analysis and were almost identical to their corresponding SureSelect-  
308 enriched pair (2 and 0 SNPs different, respectively). Only one multiplexed sample, 303D,  
309 generated enough data to reconstruct the genome for this analysis.

310

## 311 9. Discussion

312 This study demonstrates the utility of target enrichment for the culture-free detection of  
313 *Neisseria gonorrhoeae* directly from urine and urethral swabs by sequencing. We also show,  
314 for the first time with Nanopore sequencing, that target enrichment can be achieved after  
315 multiplexing of samples prior to enrichment.

316

317 Where enrichment was successful it was possible to achieve >96.5% genome coverage  
318 breadth at a depth of 300-fold or greater, representing a minimum 40-fold improvement in  
319 coverage depth. Multiplexing with enrichment still provided >20-fold coverage depth in all  
320 samples tested. The depth and breadth of *N. gonorrhoeae* genome coverage achieved after  
321 enrichment enabled detection of *gyrA* mutations known to confer resistance to quinolones  
322 in all samples with enriched sequence data reported as resistant to nalidixic acid, and  
323 additionally detected mutations in a sample with no susceptibility data due to failed growth  
324 on culture. Targeted enrichment allowed sequencing at high depth of other chromosomal  
325 genes known to confer antimicrobial resistance, e.g., the *mtrR* gene where a mutation at  
326 amino acid position 45 confers both multi-drug and macrolide resistance. This offers  
327 confidence that resistance should be detected if it were present.

328

329 mNGS holds promise for use in routine clinical diagnostics(17) but is hampered by high levels  
330 of host DNA, which dominates when nucleic acid is extracted directly from a sample without  
331 initial culture, and subsequently overwhelms the sequence data such that information on  
332 pathogens is often very limited (for example(18)). Target enrichment enables selection of the  
333 genome of interest over contaminating host DNA, and is useful where the target pathogen is  
334 known in advance of the diagnostic test. Prevalence of multi-drug resistant *N. gonorrhoeae*  
335 and the need for a fast diagnostic that can detect both the pathogen and any corresponding  
336 antimicrobial resistance makes targeted sequencing an appealing prospect.

337

338 Susceptibility testing relies on culture, but *N. gonorrhoeae* can sometimes be difficult to  
339 grow in the laboratory. This study demonstrates the additional value of sequencing with  
340 enrichment, detecting *gyrA* mutations with a mean coverage depth of 116-fold in a sample  
341 that did not grow in culture.

342



343 Detection of plasmid-mediated resistance genes was less successful, with enrichment  
344 missing detection of beta-lactamase known to be present by laboratory testing in the  
345 majority of samples, and despite detection of *blaTEM-1* in the sequence data of six samples  
346 before enrichment. Inefficient amplification of plasmid DNA pre-hybridisation, or the short  
347 SureSelect probes not effectively pulling out the plasmid-bound gene during hybridisation,  
348 could be possible explanations for the unsuccessful detection of *blaTEM-1* but further work  
349 is required to determine the exact reason.

350  
351 Two samples failed enrichment. Analysis of their post-enrichment sequence data identified  
352 predominantly laboratory kit-based contaminants in addition to low numbers of reads  
353 mapping to *N. gonorrhoeae*. We propose that this is due to the very low amount of *N.*  
354 *gonorrhoeae* DNA in the original urine extract for these two samples, as has been described  
355 by others studying low bacterial load samples(19,20).

356  
357 Multiplexing allowed a median 12-fold improvement in genome coverage when four  
358 samples were barcoded and pooled prior to hybridisation and detection of relevant AMR  
359 determinants. Demultiplexing samples after sequencing leads to loss of data as some reads  
360 remain unclassified due to a barcoding score lower than the default requirement in Guppy.  
361 The larger than expected number of unclassified reads generated from the multiplexed  
362 samples could be a consequence of the combination of barcoding and ligation library  
363 preparation used to prepare these samples, but further work would be required to  
364 determine this. The number of unclassified reads could potentially be reduced by changing  
365 the minimum barcoding score requirements, although this carries the risk of increased false-  
366 positive calls.

367  
368 Other limitations of this study include the large starting amount of DNA required for this  
369 hybridisation method. Often, DNA extracts directly from clinical samples fail to generate the  
370 required 3.5µg required for the ONT Sequence Capture protocol. Extracts from urine and  
371 urethral swabs do, in general, achieve the required amount of DNA. However, samples from  
372 sterile sites without much host DNA contamination, for example CSF samples, or from  
373 samples with a limited volume or size, would not be good candidates for probe-based  
374 enrichment with Nanopore sequencing. The method is performed over two days, with a 16-  
375 hour overnight hybridisation, which makes it a lengthy assay. Although there could  
376 potentially be some optimisation of the protocol, it currently cannot compete with the time  
377 it takes to perform a NAAT or other molecular assay, but is still likely faster than culture.  
378 There are also limitations arising from artefacts introduced by ONT sequencing, as seen for  
379 some samples in Figure 5. However, this study was performed with version 9.4.1 flowcells,  
380 and the more recent generation of flowcells, versions 10 onwards, may address this(21). In  
381 our data we observed uneven enrichment across target AMR genes, with the 23S gene in  
382 particular under-represented in enriched sequence data. Future work could optimise probes  
383 in this region of the genome to increase coverage of this important gene.

384  
385 The nucleic acid amplification tests are a reliable method for detecting *N. gonorrhoeae* but  
386 cannot give the whole picture of AMR, an important consideration given the increasing  
387 prevalence of multi-drug resistant gonorrhoea. This study demonstrates sequencing with  
388 target enrichment can enable high-depth chromosomal antimicrobial resistance gene

389 characterisation and relatedness detection that was not previously possible for these sample  
390 types with direct metagenomic sequencing. Additionally, multiplexing prior to enrichment  
391 allows higher sample throughput and reduction in the costs associated with both probe-  
392 based enrichment and sequencing.

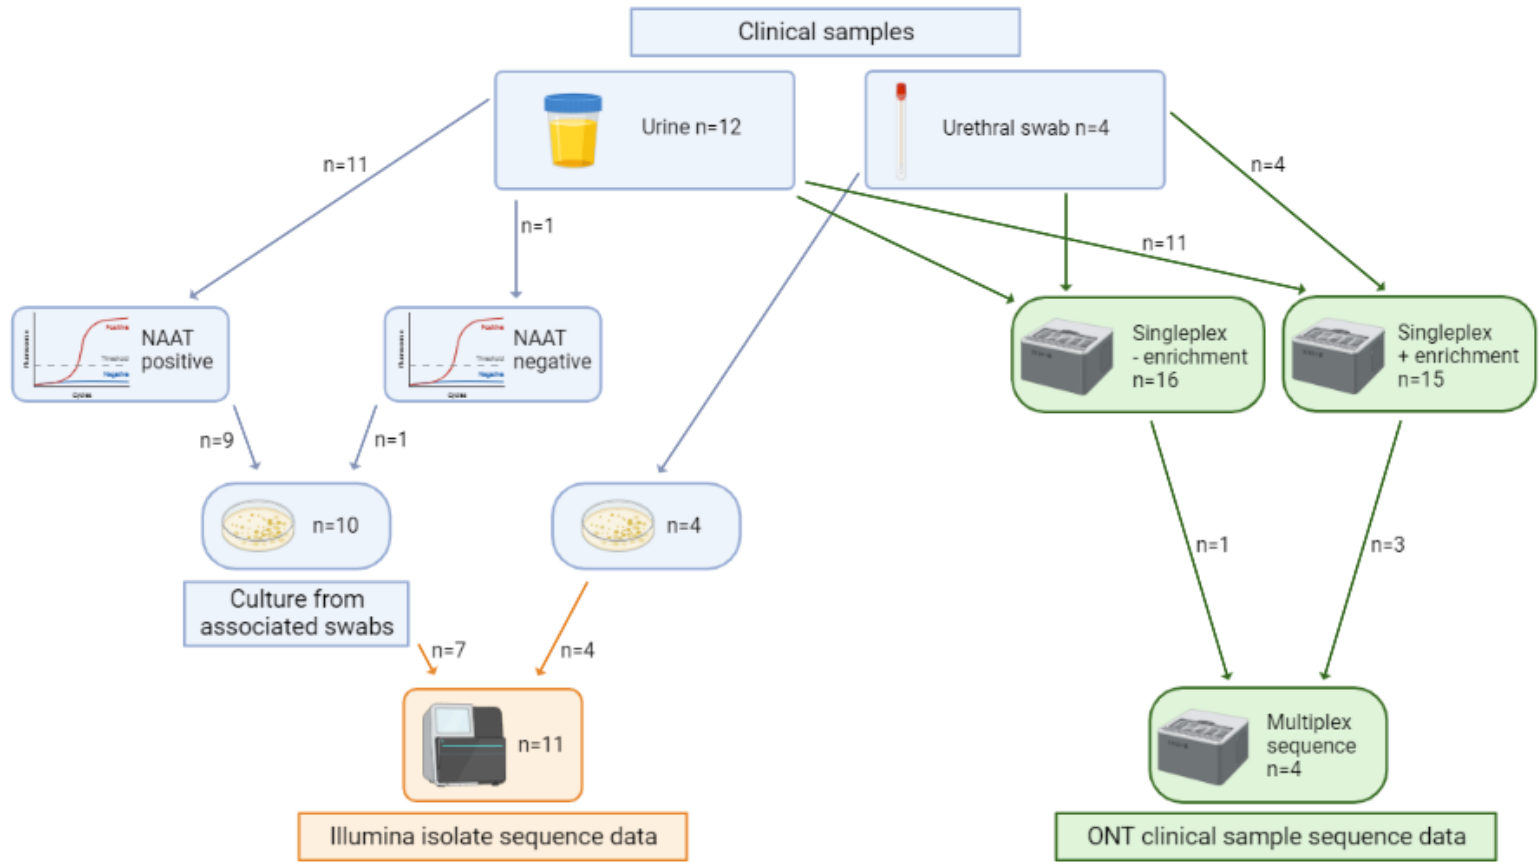

394  
395 Figure 1. Sample summary. Figure created with BioRender

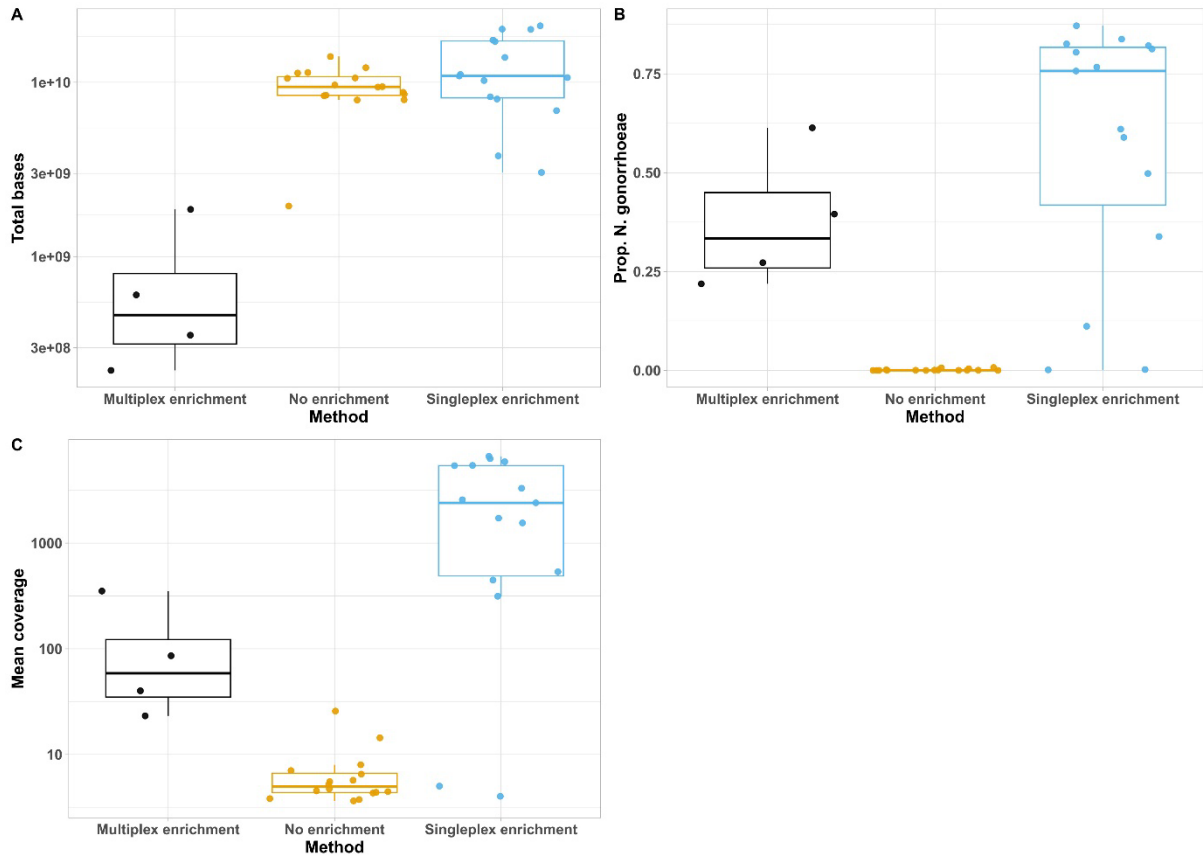

396  
397 **Figure 2. Comparison of sequence data before and after enrichment. Total number of bases per**  
398 **sequencing run (A); Percentage of bases classified as *N. gonorrhoeae* (B); Average coverage depth**  
399 **of *N. gonorrhoeae* genome per sequencing run (C) for samples sequenced without enrichment**  
400 **(orange), with singleplex enrichment (blue) or with enrichment in a multiplex of 4 samples (black).**

401

402

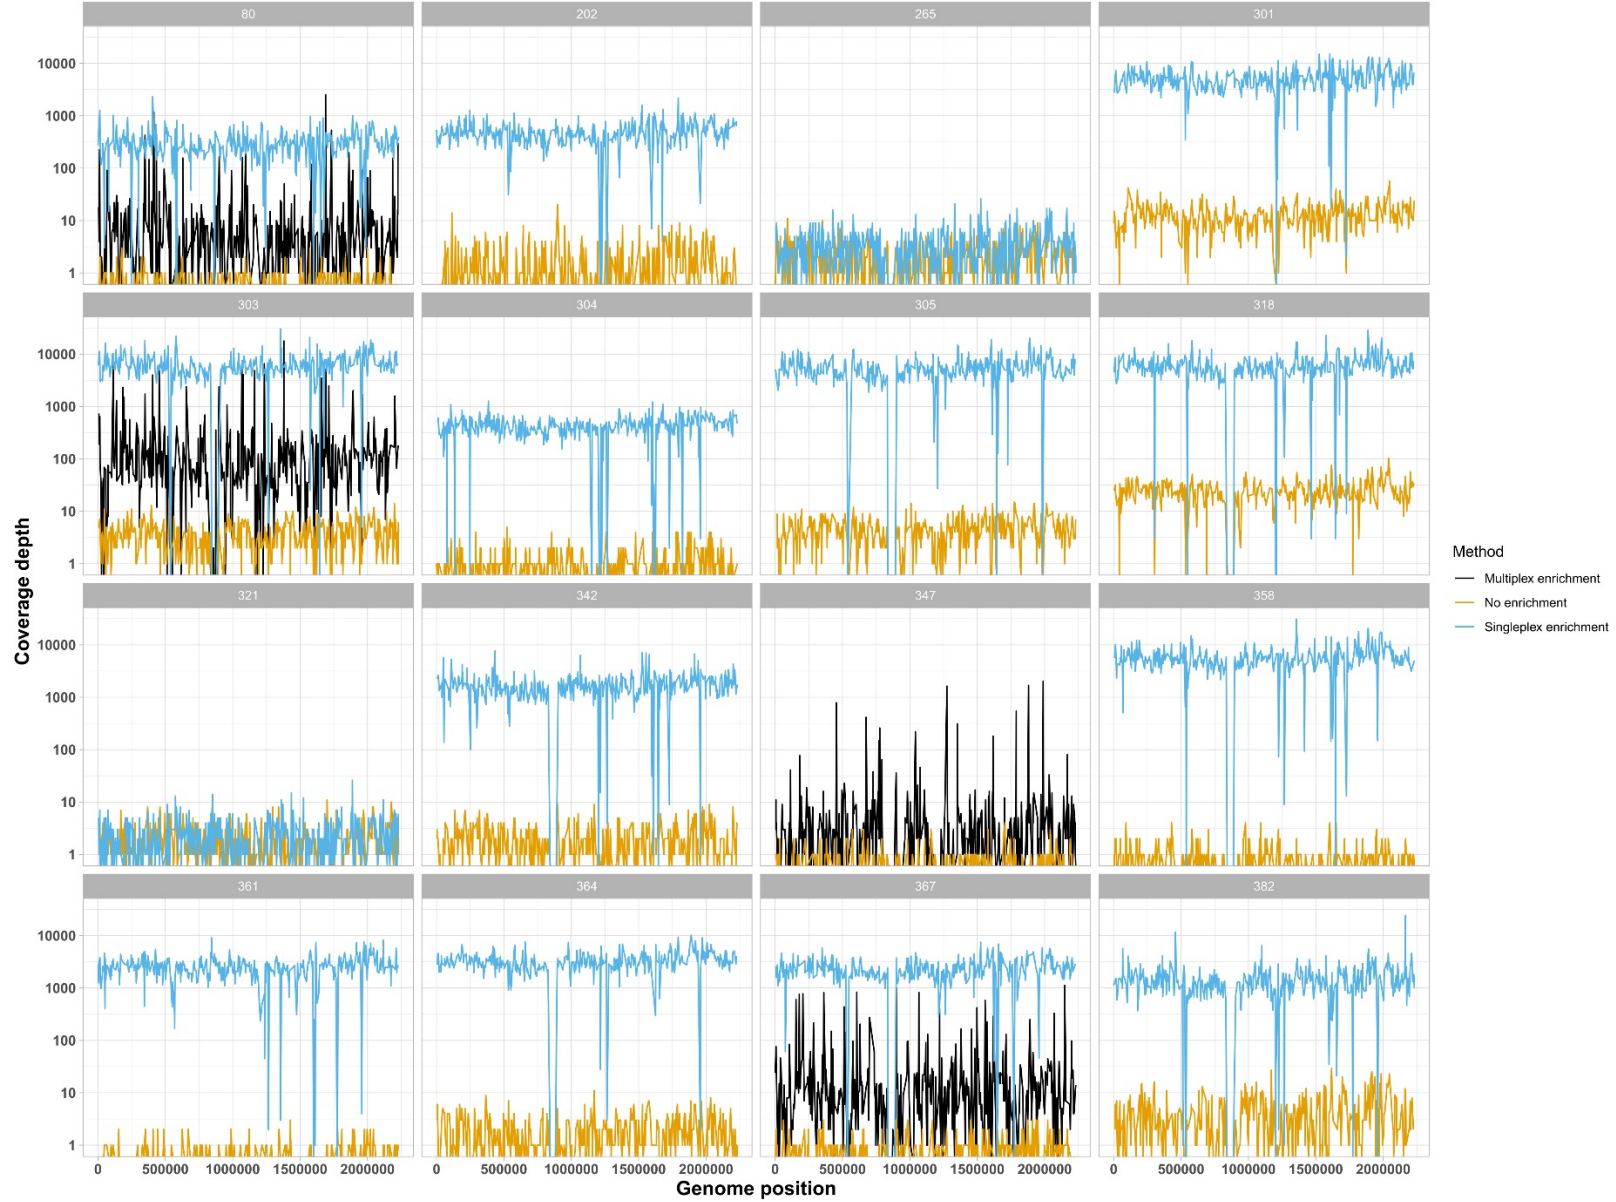



404 **Figure 3. Genome coverage depth for samples sequenced without enrichment (orange), with singleplex enrichment (blue) or with enrichment in a**  
405 **multiplex of 4 samples (black). Sample 347 has sequence data without enrichment and with multiplexed enrichment only. Short regions of low coverage**  
406 **seen in blue represent areas of divergence between the sample and the reference genome used for mapping and/or the genomes included in the probe**  
407 **set. The similar troughs seen with the orange and blue lines suggest that divergence from the reference genome is the most likely explanation, rather**  
408 **than a gap in the probe set.**

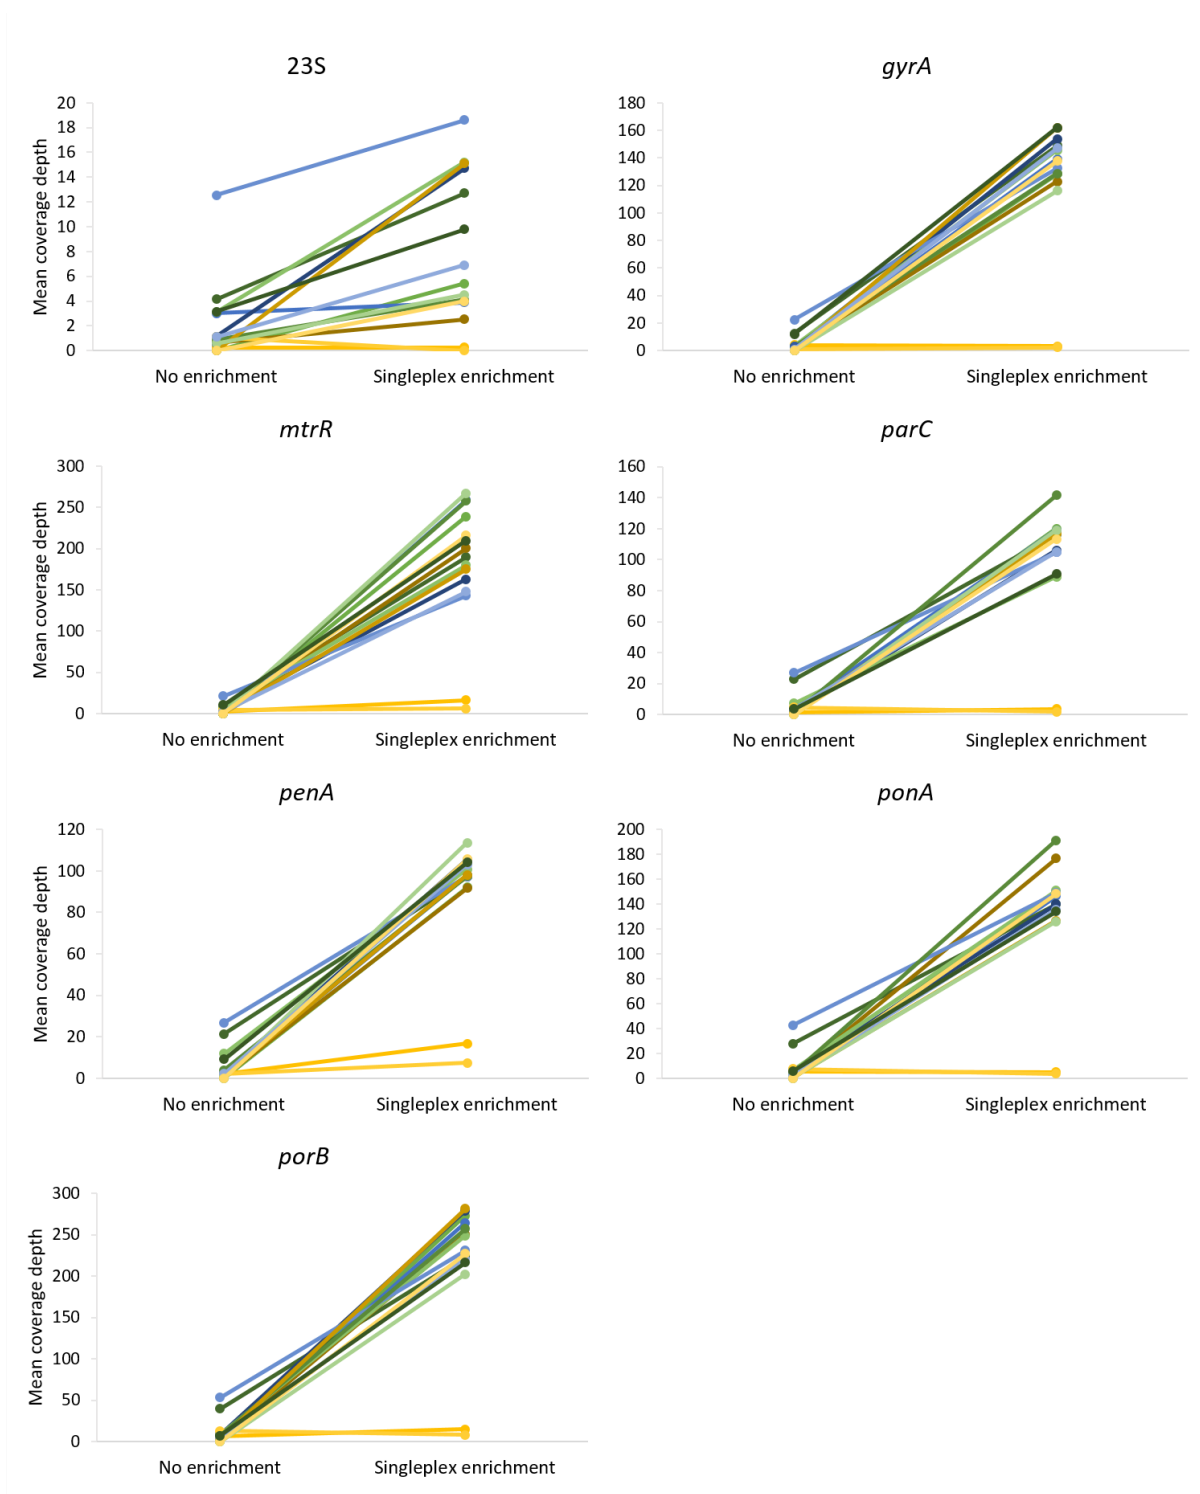

409  
410  
411  
412

**Figure 4. Comparison of mean coverage depth for 7 antimicrobial resistance determinants before and after target enrichment. Different colours are used for each sample pair with and without enrichment.**

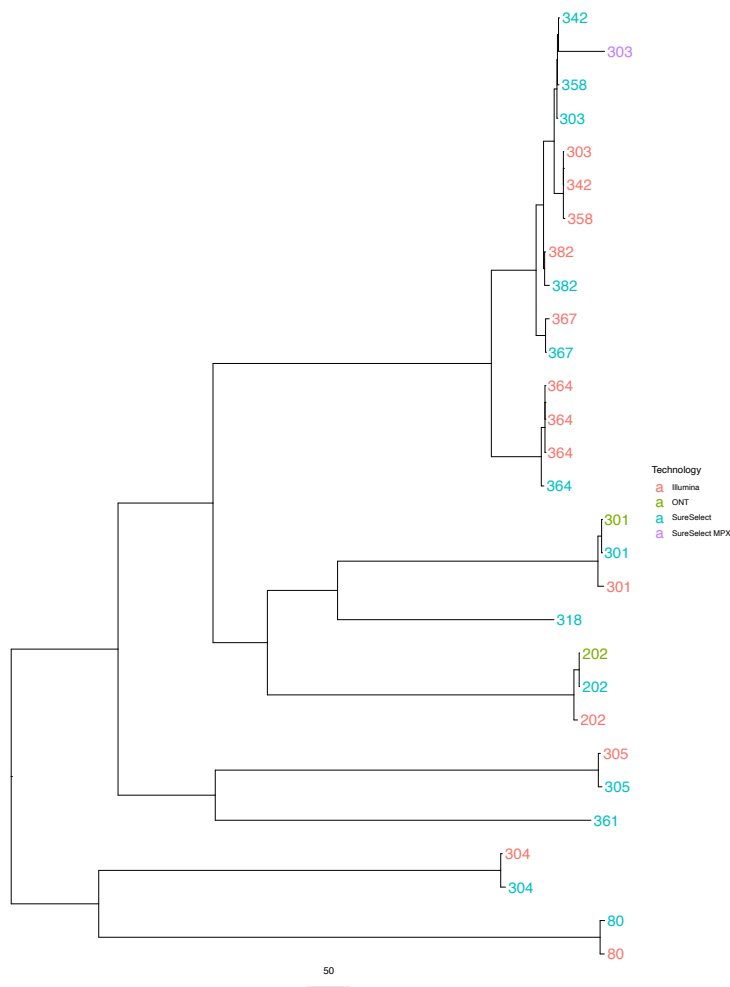

413  
414 **Figure 5. Maximum likelihood tree of genomes generated from consensus sequences, comparing**  
415 **the same samples sequenced with Illumina (red), Nanopore with no enrichment (green), Nanopore**  
416 **with singleplex enrichment (blue) and Nanopore with multiplexed enrichment (purple). Sample**  
417 **364 has three Illumina sequences generated from two rectal swab cultures (not included in**  
418 **enrichment and singleplex sequencing) and one urethral swab culture.**

419 **11. Tables**

| Sample | Sample type for culture | Sample type for sequencing | Ciprofloxacin/<br>Nalidixic acid | Cephalosporins | Azithromycin | Penicillin | B-lactamase* |
|--------|-------------------------|----------------------------|----------------------------------|----------------|--------------|------------|--------------|
| 80U    | Urethral swab           | Urine                      | S                                | S              | S            | no test    | no test      |
| 202D   | Urethral swab           | Urethral swab              | S                                | S              | S            | S          | N            |
| 265UB  | Urethral swab           | Urine                      | R                                | S              | S            | R          | P            |
| 301D   | Urethral swab           | Urethral swab              | R                                | S              | S            | I          | N            |
| 303D   | Urethral swab           | Urethral swab              | R                                | S              | S            | R          | P            |
| 304D   | Urethral swab           | Urethral swab              | S                                | S              | S            | I          | N            |
| 305UB  | Urethral swab           | Urine                      | R                                | S              | S            | R          | P            |
| 318UB  | No growth on culture    | Urine                      |                                  |                |              |            |              |
| 321UB  | Urethral swab           | Urine                      | S                                | S              | S            | S          | N            |
| 342UB  | Urethral swab           | Urine                      | R                                | S              | S            | R          | P            |
| 347UB  | Urethral swab           | Urine                      | R                                | S              | S            | R          | P            |
| 358UB  | Urethral swab           | Urine                      | R                                | S              | S            | R          | P            |
| 361UB  | No growth on culture    | Urine                      |                                  |                |              |            |              |
| 364UB  | Urethral swab           | Urine                      | R                                | S              | S            | R          | P            |
| 367UB  | Urethral swab           | Urine                      | R                                | S              | S            | R          | P            |
| 382UB  | Urethral swab           | Urine                      | R                                | S              | S            | R          | P            |

420

421 **Table 1. Antimicrobial susceptibility results. S, sensitive; I, intermediate; R, resistant; \*for B-lactamase,**  
 422 **N denotes susceptible; P denotes possible resistance.**

| Sample name | Without enrichment |             |                             |                        | With singleplex enrichment |             |                             |                        | Coverage depth fold-enrichment, singleplex vs no enrichment |
|-------------|--------------------|-------------|-----------------------------|------------------------|----------------------------|-------------|-----------------------------|------------------------|-------------------------------------------------------------|
|             | Ngon bases         | Total bases | Genome coverage breadth (%) | Average coverage depth | Ngon bases                 | Total bases | Genome coverage breadth (%) | Average coverage depth |                                                             |
| 80U         | 749179             | 8434029003  | 3.46                        | 7.98                   | 1280208433                 | 3782522608  | 97.44                       | 314.12                 | 39.3                                                        |
| 202D        | 4184726            | 9656053514  | 35.73                       | 4.45                   | 1550689332                 | 13895666698 | 98.53                       | 536.27                 | 120.6                                                       |
| 265UB       | 5949401            | 11386449183 | 58.55                       | 3.82                   | 17922316                   | 8014502433  | 73.45                       | 5.01                   | 1.31                                                        |
| 301D        | 35361341           | 7933536503  | 98.83                       | 14.36                  | 14947146476                | 17150934403 | 99.80                       | 5413.55                | 377.0                                                       |
| 303D        | 9692745            | 9439958602  | 82.96                       | 4.73                   | 17664552591                | 21087141427 | 97.08                       | 6637.14                | 1403.8                                                      |
| 304D        | 1937846            | 7906566477  | 17.88                       | 4.32                   | 1790026178                 | 3038176523  | 97.49                       | 447.24                 | 103.5                                                       |
| 305UB       | 12659589           | 9391830588  | 86.68                       | 5.53                   | 14039629756                | 17449531128 | 96.75                       | 5432.74                | 983.0                                                       |
| 318UB       | 62722932           | 8544860509  | 96.36                       | 25.72                  | 16557094125                | 20163378663 | 97.03                       | 6295.03                | 244.8                                                       |
| 321UB       | 7745538            | 12127667362 | 57.53                       | 4.38                   | 9600291                    | 6880830294  | 53.10                       | 4.02                   | 0.92                                                        |
| 342UB       | 4929172            | 14056225894 | 51.44                       | 3.75                   | 6489125469                 | 10636014129 | 96.70                       | 1724.94                | 460.4                                                       |
| 358UB       | 1399857            | 11292620134 | 10.46                       | 5.22                   | 15428552493                | 20118811661 | 97.09                       | 5905.35                | 1131.6                                                      |
| 361UB       | 698401             | 8371283598  | 3.78                        | 7.05                   | 7748292558                 | 10234243279 | 99.04                       | 2576.51                | 365.4                                                       |
| 364UB       | 4923268            | 8765729938  | 51.80                       | 3.64                   | 8974767733                 | 10869934865 | 96.84                       | 3304.73                | 908.2                                                       |
| 367UB       | 1474533            | 10579314587 | 12.82                       | 4.52                   | 6713863610                 | 8261193715  | 96.63                       | 2405.44                | 532.2                                                       |
| 382UB       | 12826754           | 1949351698  | 71.43                       | 6.52                   | 5518490118                 | 11085690959 | 96.73                       | 1552.06                | 238.2                                                       |

423

424

425

426

**Table 2. Summary of bases classified as *N. gonorrhoeae* (Ngon), total bases, single-fold genome coverage breadth, and average genome coverage depth for all samples before and after singleplex enrichment.**



| Sample | Without enrichment |                             |                        | With singleplex enrichment   |                             |                        | With multiplex enrichment |                             |                        | Coverage depth fold-enrichment, multiplex vs no enrichment |
|--------|--------------------|-----------------------------|------------------------|------------------------------|-----------------------------|------------------------|---------------------------|-----------------------------|------------------------|------------------------------------------------------------|
|        | Total Ngon bases   | Genome coverage breadth (%) | Average coverage depth | Total Ngon bases             | Genome coverage breadth (%) | Average coverage depth | Total Ngon bases          | Genome coverage breadth (%) | Average coverage depth |                                                            |
| 80U    | 749179             | 3.46                        | 7.98                   | 1280208433                   | 97.44                       | 314.12                 | 96384278                  | 71.91                       | 40.05                  | 5.02                                                       |
| 303D   | 9692745            | 82.96                       | 4.73                   | 17664552591                  | 97.08                       | 6637.14                | 1144125623                | 94.61                       | 352.47                 | 74.5                                                       |
| 347UB  | 1066606            | 7.23                        | 5.69                   | No singleplex data available |                             |                        | 47875172                  | 52.70                       | 48688685               | 4.07                                                       |
| 367UB  | 1474533            | 12.82                       | 4.52                   | 6713863610                   | 96.63                       | 2405.44                | 238397019                 | 82.44                       | 85.96                  | 19.0                                                       |

427

428

429

**Table 3. Comparison of no enrichment, singleplex enrichment and multiplex enrichment. Total bases classified as *N. gonorrhoeae* (Ngon), single-fold genome coverage breadth, and genome coverage depth reported for the 4 samples sequenced as a multiplex.**

## 430 **12. Author statements**

### 431 **12.1 Author contributions**

432 TLS, NDS, ML and DWE designed the study. NDS conducted the bioinformatics analysis. TLS,  
433 LB and JK performed laboratory experiments. KC organised clinical samples, performed  
434 culturing and collated metadata for samples collected in Brighton. TLS, NDS and DWE  
435 prepared the manuscript. The GonFast Investigators Group recruited patients and collected  
436 samples. All authors read and contributed to the manuscript.  
437

### 438 **12.2 Conflicts of interest**

439 The authors declare no conflicts of interest.  
440

### 441 **12.3 Funding information**

442 This study was funded by the Centers for Disease Control and Prevention, USA.  
443 This study was also supported by the National Institute for Health Research (NIHR) Oxford  
444 Biomedical Research Centre (BRC). The funders had no role in study design, data collection  
445 and interpretation, or the decision to submit the work for publication. The views expressed  
446 are those of the authors and not necessarily those of the NHS, NIHR or Department of  
447 Health. DWE is a Robertson Foundation Big Data Institute Fellow.  
448

### 449 **12.4 Ethical approval**

450 This study was conducted with NHS Research Ethics committee approval (reference  
451 19/EM/0029).  
452

### 453 **12.5 Acknowledgements**

454 We thank the microbiology laboratory staff of Oxford University Hospitals NHS Foundation  
455 Trust and the University Hospitals Sussex NHS Foundation Trust for providing assistance with  
456 sample collection.

457 The GonFast Investigators Group includes Joanna Rees and Emily Lord (Oxfordshire Sexual  
458 Health Service, Oxford University Hospitals NHS Foundation Trust, Oxford); and Suneeta  
459 Soni, Celia Richardson, Joanne Jessop, and Tanya Adams (Brighton and Hove sexual health  
460 and contraception service, Royal Sussex County Hospital, Brighton).  
461

## 462 **13. References**

- 463 1. Unemo M, Shafer WM. Antimicrobial Resistance in *Neisseria gonorrhoeae* in the 21st  
464 Century: Past, Evolution, and Future. *Clin Microbiol Rev.* 2014 Jul;27(3):587–613.
- 465 2. Eyre DW, Town K, Street T, Barker L, Sanderson N, Cole MJ, et al. Detection in the  
466 United Kingdom of the *Neisseria gonorrhoeae* {FC428} clone, with ceftriaxone resistance  
467 and intermediate resistance to azithromycin, October to December 2018. *Euro Surveill.*  
468 2019 Mar;24(10).

- 469 3. Golparian D, Vestberg N, Södersten W, Jacobsson S, Ohnishi M, Fang H, et al.  
470 Multidrug-resistant *Neisseria gonorrhoeae* isolate SE690: mosaic penA-60.001 gene  
471 causing ceftriaxone resistance internationally has spread to the more antimicrobial-  
472 susceptible genomic lineage, Sweden, September 2022. *Eurosurveillance* [Internet]. 2023  
473 Mar 9 [cited 2023 Apr 27];28(10). Available from:  
474 <https://www.eurosurveillance.org/content/10.2807/1560-7917.ES.2023.28.10.2300125>
- 475 4. Sawatzky P, Demczuk W, Lefebvre B, Allen V, Diggle M, Hoang L, et al. Increasing  
476 Azithromycin Resistance in *Neisseria gonorrhoeae* Due to NG-MAST 12302 Clonal Spread  
477 in Canada, 2015 to 2018. *Antimicrob Agents Chemother*. 2022 Mar 15;66(3):e01688-21.
- 478 5. European Centre for Disease Prevention and Control. Gonorrhoea. In: ECDC. Annual  
479 Epidemiological Report for 2019. Stockholm: ECDC; 2023 [Internet]. [cited 2023 Apr 27].  
480 Available from: <https://www.ecdc.europa.eu/en/publications-data/gonorrhoea-annual-epidemiological-report-2019>  
481
- 482 6. Chiu CY, Miller SA. Clinical metagenomics. *Nat Rev Genet*. 2019 Jun;20(6):341–55.
- 483 7. Street TL, Barker L, Sanderson ND, Kavanagh J, Hoosdally S, Cole K, et al. Optimizing  
484 DNA Extraction Methods for Nanopore Sequencing of *Neisseria gonorrhoeae* Directly  
485 from Urine Samples. *J Clin Microbiol* [Internet]. 2020 Feb 24 [cited 2020 Jul 3];58(3).  
486 Available from: <https://jcm.asm.org/content/58/3/e01822-19>
- 487 8. Sanderson ND, Swann J, Barker L, Kavanagh J, Hoosdally S, Crook D, et al. High  
488 precision *Neisseria gonorrhoeae* variant and antimicrobial resistance calling from  
489 metagenomic Nanopore sequencing. *Genome Res* [Internet]. 2020 Sep 1 [cited 2020 Sep  
490 14]; Available from: <http://genome.cshlp.org/content/early/2020/09/01/gr.262865.120>
- 491 9. Cai W, Nunziata S, Rascoe J, Stulberg MJ. SureSelect targeted enrichment, a new cost  
492 effective method for the whole genome sequencing of *Candidatus Liberibacter asiaticus*.  
493 *Sci Rep*. 2019 Dec 12;9(1):18962.
- 494 10. Brown AC, Bryant JM, Einer-Jensen K, Holdstock J, Houniet DT, Chan JZM, et al. Rapid  
495 Whole-Genome Sequencing of *Mycobacterium tuberculosis* Isolates Directly from Clinical  
496 Samples. Land GA, editor. *J Clin Microbiol*. 2015 Jul;53(7):2230–7.
- 497 11. Bowden KE, Joseph SJ, Cartee JC, Ziklo N, Danavall D, Raphael BH, et al. Whole-  
498 Genome Enrichment and Sequencing of *Chlamydia trachomatis* Directly from Patient  
499 Clinical Vaginal and Rectal Swabs. Rasmussen AL, editor. *mSphere*. 2021 Apr  
500 28;6(2):e01302-20.
- 501 12. Doyle RM, Burgess C, Williams R, Gorton R, Booth H, Brown J, et al. Direct Whole-  
502 Genome Sequencing of Sputum Accurately Identifies Drug-Resistant *Mycobacterium*  
503 *tuberculosis* Faster than MGIT Culture Sequencing. Mellmann A, editor. *J Clin Microbiol*.  
504 2018 Aug;56(8):e00666-18.

- 505 13. Sanderson ND, Street TL, Foster D, Swann J, Atkins BL, Brent AJ, et al. Real-time  
506 analysis of nanopore-based metagenomic sequencing from infected orthopaedic devices.  
507 BMC Genomics. 2018 Sep;19(1):714.
- 508 14. Seemann, Torsten. Snippy: Rapid haploid variant calling and core genome alignment  
509 [Internet]. 2015. Available from: <https://github.com/tseemann/snippy>
- 510 15. Nguyen LT, Schmidt HA, Von Haeseler A, Minh BQ. IQ-TREE: A Fast and Effective  
511 Stochastic Algorithm for Estimating Maximum-Likelihood Phylogenies. Mol Biol Evol. 2015  
512 Jan;32(1):268–74.
- 513 16. Didelot X, Wilson DJ. ClonalFrameML: Efficient Inference of Recombination in Whole  
514 Bacterial Genomes. Prlic A, editor. PLOS Comput Biol. 2015 Feb 12;11(2):e1004041.
- 515 17. Miller S, Chiu C. The Role of Metagenomics and Next-Generation Sequencing in  
516 Infectious Disease Diagnosis. Clin Chem. 2021 Dec 30;68(1):115–24.
- 517 18. Street TL, Sanderson ND, Atkins BL, Brent AJ, Cole K, Foster D, et al. Molecular  
518 Diagnosis of OrthopedicDevice-Related Infection Directly from Sonication Fluid by  
519 Metagenomic Sequencing. J Clin Microbiol. 2017;(August):JCM.00462-17.
- 520 19. Salter SJ, Cox MJ, Turek EM, Calus ST, Cookson WO, Moffatt MF, et al. Reagent and  
521 laboratory contamination can critically impact sequence-based microbiome analyses.  
522 BMC Biol. 2014 Nov 12;12(1):87.
- 523 20. Paniagua Voirol LR, Valsamakis G, Yu M, Johnston PR, Hilker M. How the ‘kitome’  
524 influences the characterization of bacterial communities in lepidopteran samples with low  
525 bacterial biomass. J Appl Microbiol. 2021 Jun 1;130(6):1780–93.
- 526 21. Ni Y, Liu X, Simeneh ZM, Yang M, Li R. Benchmarking of Nanopore R10.4 and R9.4.1  
527 flow cells in single-cell whole-genome amplification and whole-genome shotgun  
528 sequencing. Comput Struct Biotechnol J. 2023;21:2352–64.

529
